# Supplementary material
Source: publisher figshare collection journal article supplement (https://acs.figshare.com/ndownloader/files/4265461)
Supplement: Supplementary file 1 [file 4265461]

Supporting Information to:

Fluorescence-based high throughput screening for noble metal-free and platinum-poor anode catalysts for the direct methanol fuel cell (DMFC)

F. G. Welsch, K. Stöwe, W. F. Maier\*

Lehrstuhl für Technische Chemie, Universität des Saarlandes, Gebäude C4 2, 66123 Saarbrücken, Germany

\* Corresponding author: Tel.: +496 81 302 2422

E-Mail address: [w.f.maier@mx.uni-saarland.de](mailto:w.f.maier@mx.uni-saarland.de)

Sveral diagrams and schemes are provided for more detailed understanding of the arguments and conclusions presented.

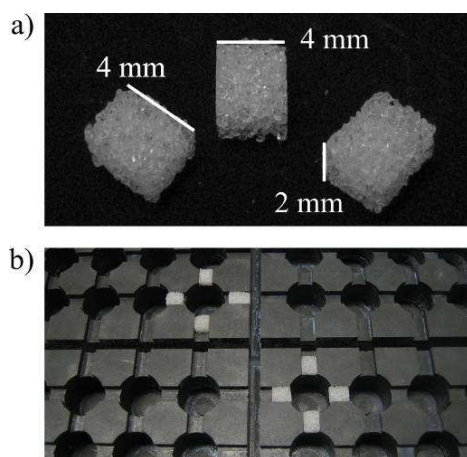

Fig. S1

Frits used for conventional measurements (a); frits positioned in the surrounding channels of the graphite plate relief (b).

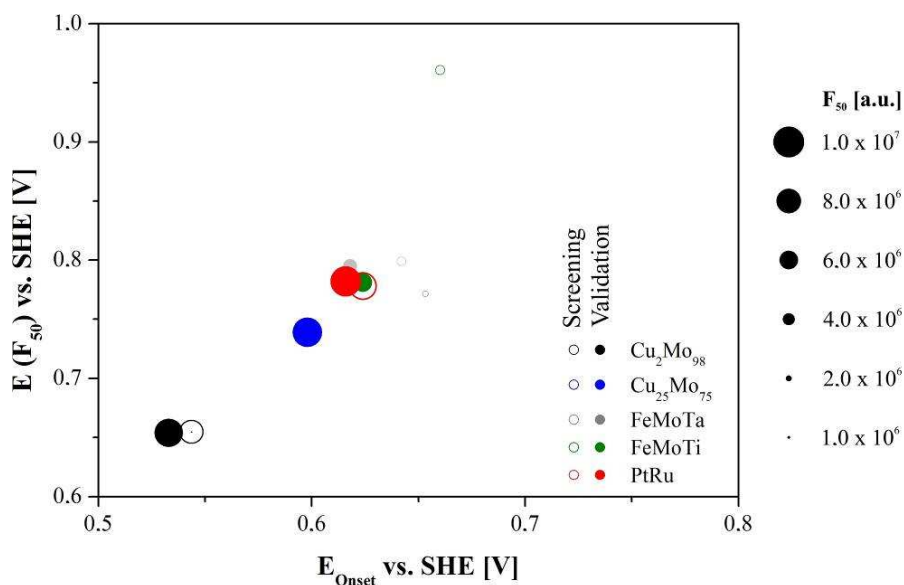

Fig. S2

Comparison of the noble-metal free materials' activity towards the electrooxidation of methanol obtained in the high-throughput screening by means of their position in the  $E(F_{50})/E_{\text{Onset}}$  plane and the fluorescence intensity  $F_{50}$ , cycles: position based on the comparative values determined in the high-throughput screening, filled cycles: position based on the comparative values determined in the fluorescence based validation measurements.

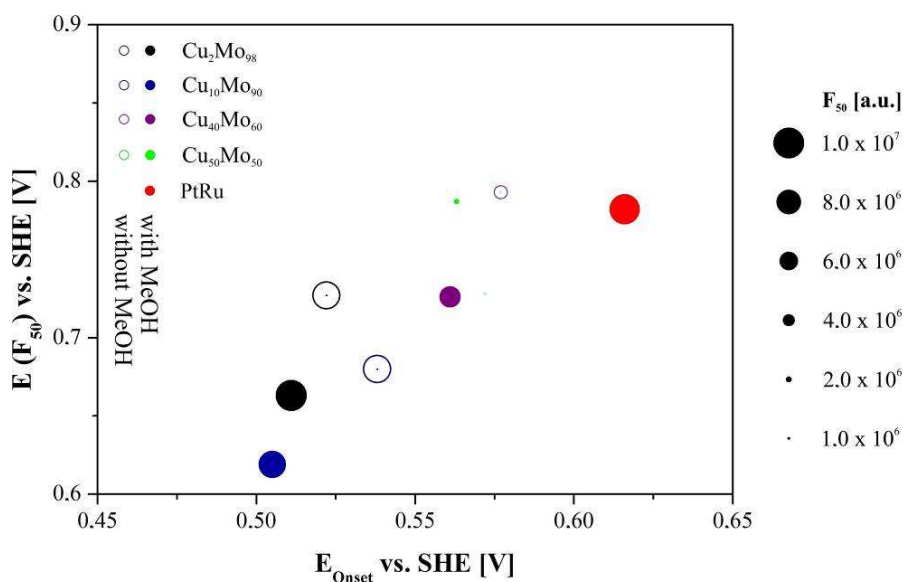

Fig. S3

Comparison of the fluorescence development of the compounds of the binary Cu-Mo system among the measurement with and without a methanol containing electrolyte by means of their

position in the  $E(F_{50})/E_{\text{Onset}}$  plane and the fluorescence intensity  $F_{50}$ ; cycles: measurement without methanol, filled cycles: measurement with methanol.

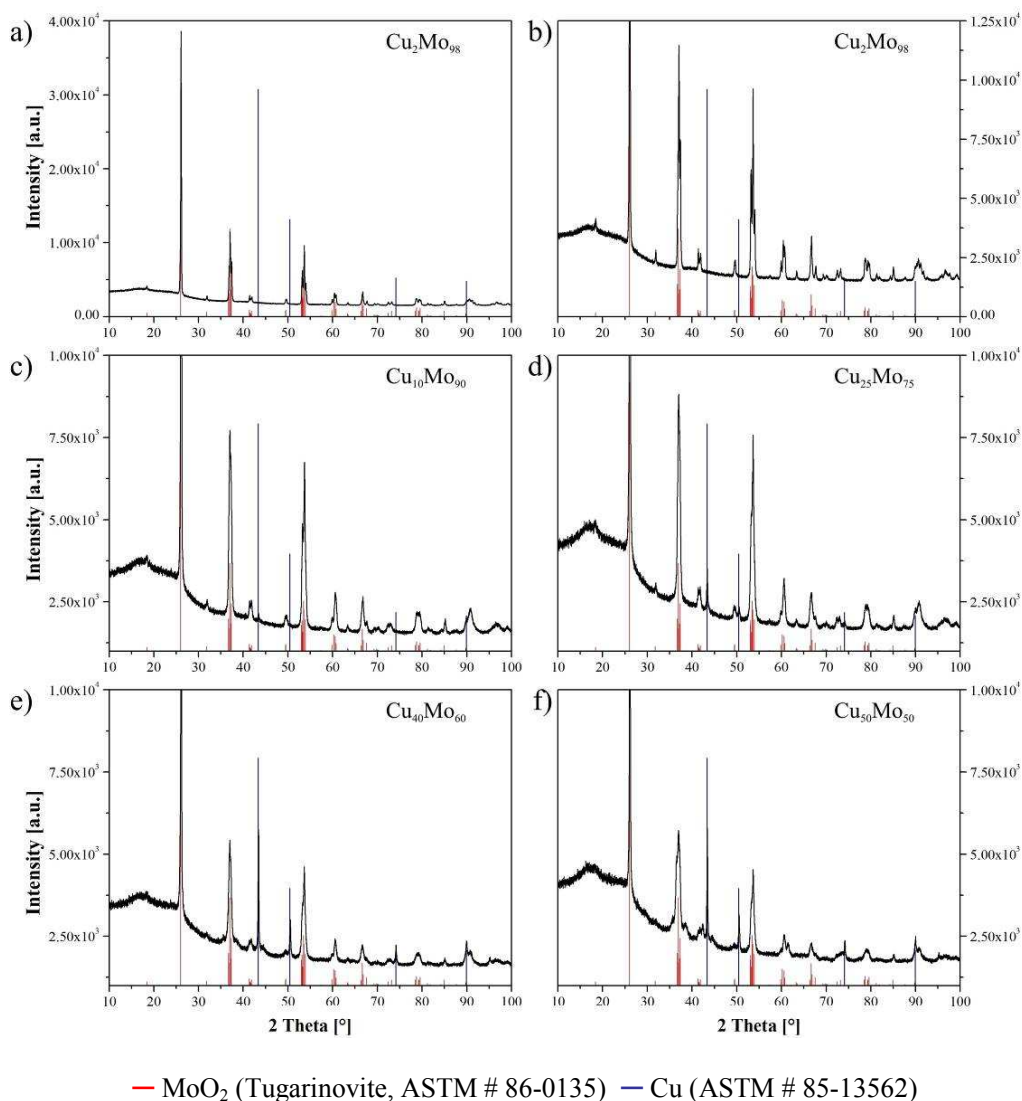

Fig. S4

X-ray diffraction pattern of a) Cu<sub>2</sub>Mo<sub>98</sub> (overview), b) Cu<sub>2</sub>Mo<sub>98</sub> (increased intensity scale), c) Cu<sub>10</sub>Mo<sub>90</sub>, d) Cu<sub>25</sub>Mo<sub>75</sub>, e) Cu<sub>40</sub>Mo<sub>60</sub>, f) Cu<sub>50</sub>Mo<sub>50</sub>; axis caption line by line and column by column, respectively.

Fig. S5

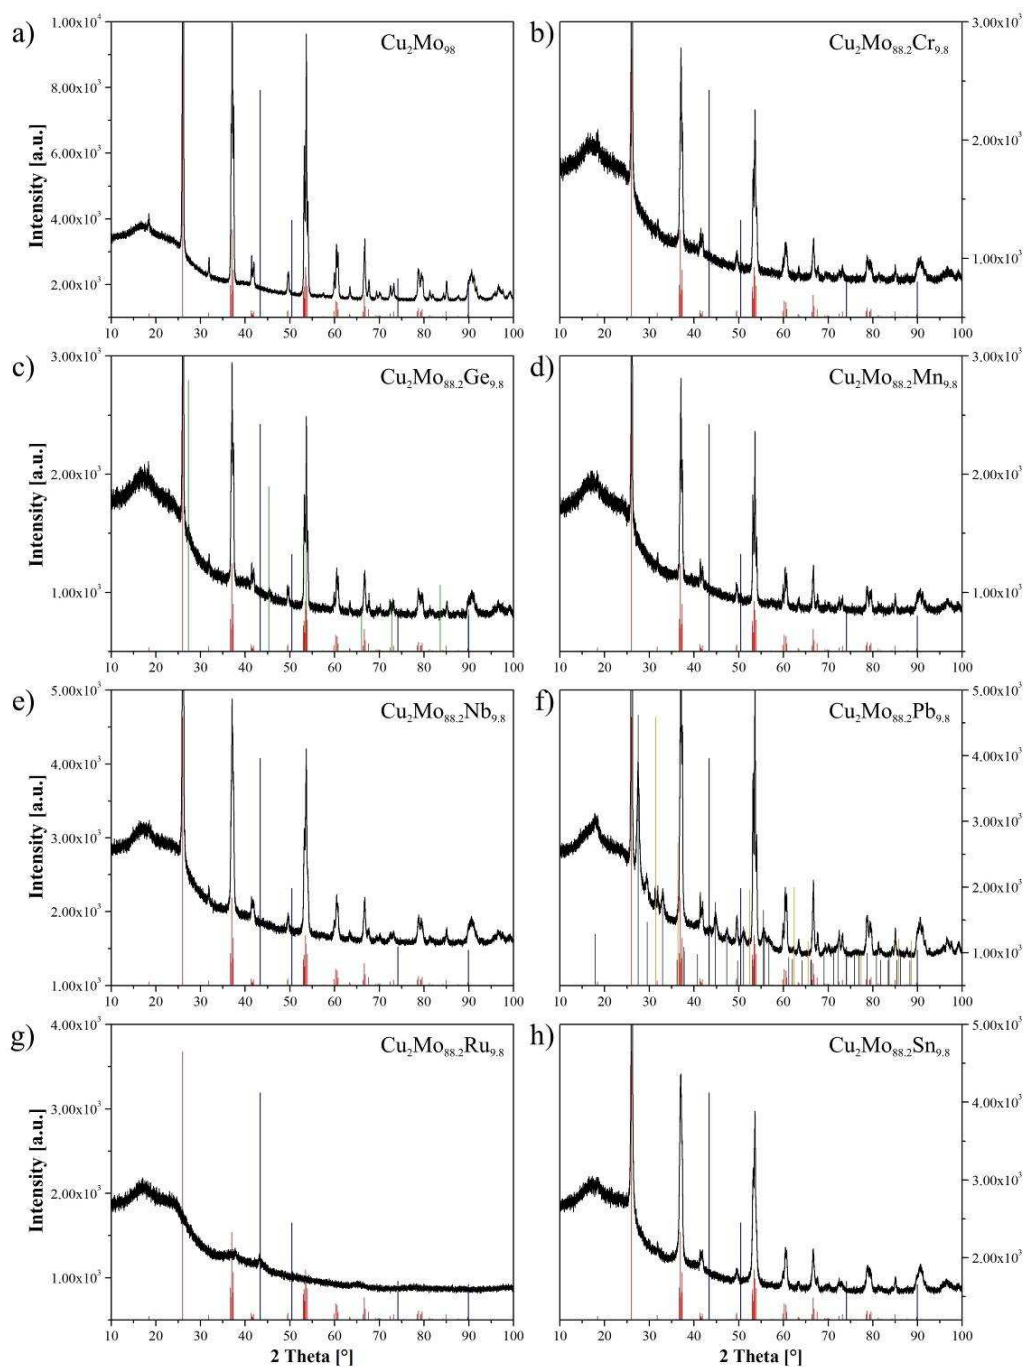

— MoO<sub>2</sub> (Tugarinovite, ASTM # 86-0135) — Cu (ASTM # 85-13562)

— Ge (ASTM # 4-545) — Pb (ASTM # 87-663) — PbMoO<sub>4</sub> (Wulfenite, ASTM # 74-1075)

Fig. S5

Powder X-ray diffraction pattern of a) Cu<sub>2</sub>Mo<sub>98</sub>, b) Cu<sub>2</sub>Mo<sub>88.2</sub>Cr<sub>9.8</sub>, c) Cu<sub>2</sub>Mo<sub>88.2</sub>Ge<sub>9.8</sub>, d) Cu<sub>2</sub>Mo<sub>88.2</sub>Mn<sub>9.8</sub>, e) Cu<sub>2</sub>Mo<sub>88.2</sub>Nb<sub>9.8</sub>, f) Cu<sub>2</sub>Mo<sub>88.2</sub>Pb<sub>9.8</sub>, g) Cu<sub>2</sub>Mo<sub>88.2</sub>Ru<sub>9.8</sub>, h) Cu<sub>2</sub>Mo<sub>88.2</sub>Sn<sub>9.8</sub>; axis caption line by line and column by column, respectively.

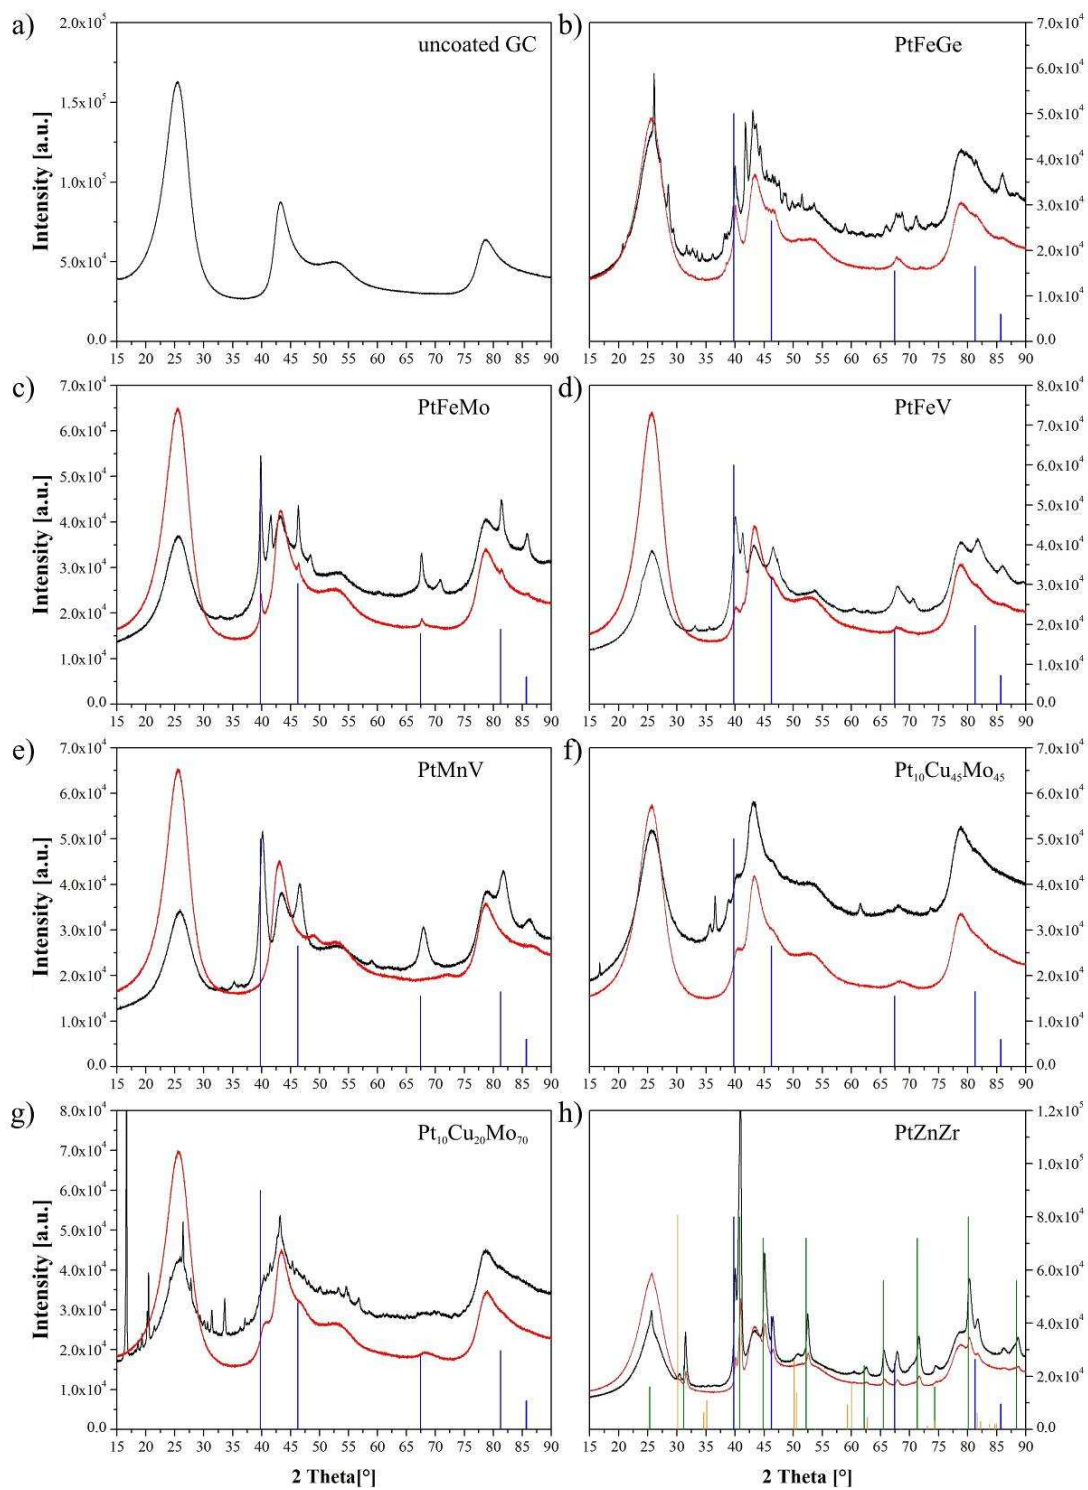

— Pt (ASTM # 04-0802) — PtZn (ASTM # 06-0604) — ZrO<sub>2</sub> (tetragonal, ASTM # 78-1601)

Fig. S6: X-ray diffraction pattern of a) uncoated glassy carbon plate, b) PtFeGe, c) PtFeMo, d) PtMnV, e) PtMnV, f) Pt<sub>10</sub>Cu<sub>45</sub>Mo<sub>45</sub>, g) Pt<sub>10</sub>Cu<sub>20</sub>Mo<sub>70</sub> h) PtZnZr before (black) and after the CV experiments (red), reference line pattern were given only for identified phases after the stability experiments.
